# Supplementary material for: dbl-1/TGF-β and daf-12/NHR Signaling Mediate Cell-Nonautonomous Effects of daf-16/FOXO on Starvation-Induced Developmental Arrest
Source: PubMed Central journal article supplement (PMC4676721; doi:10.1371/journal.pgen.1005731), 2015-12-11
Supplement: pgen.1005731.s001.pdf [file pgen.1005731.s001.pdf]

S1 Table. Starvation survival analysis of Figure 1A.

| Genotype                        | Half-life | SEM  | p-value (vs. wild type)    | p-value (vs. <i>daf-16</i> ) | R <sup>2</sup> |
|---------------------------------|-----------|------|----------------------------|------------------------------|----------------|
| wild type                       | 10.5      | 0.58 | N/A                        | <b>3.8x10<sup>-6</sup></b>   | 0.966          |
| <i>daf-16</i>                   | 4.7       | 1.01 | <b>3.8x10<sup>-6</sup></b> | N/A                          | 0.996          |
| <i>daf-16; Pdaf-16::DAF-16</i>  | 10.8      | 1.15 | 0.681                      | <b>6.7x10<sup>-5</sup></b>   | 0.961          |
| <i>daf-16; Pges-1::DAF-16</i>   | 9.1       | 0.76 | <b>0.013</b>               | <b>5.0x10<sup>-5</sup></b>   | 0.972          |
| <i>daf-16; Punc-119::DAF-16</i> | 7.2       | 1.34 | <b>0.002</b>               | <b>0.014</b>                 | 0.986          |
| <i>daf-16; Pcol-12::DAF-16</i>  | 8.6       | 1.26 | <b>0.025</b>               | <b>0.003</b>                 | 0.987          |
