# Supplementary material for: dbl-1/TGF-β and daf-12/NHR Signaling Mediate Cell-Nonautonomous Effects of daf-16/FOXO on Starvation-Induced Developmental Arrest
Source: PubMed Central journal article supplement (PMC4676721; doi:10.1371/journal.pgen.1005731), 2015-12-11
Supplement: pgen.1005731.s002.pdf [file pgen.1005731.s002.pdf]

**S2 Table. t-test results matrix for Figure 1B.**

|          |                                     | Rescue 2                            |                                   |                                    |                             |                |               |                 |                            |
|----------|-------------------------------------|-------------------------------------|-----------------------------------|------------------------------------|-----------------------------|----------------|---------------|-----------------|----------------------------|
|          |                                     | <i>Punc-119</i><br>+ <i>Pcol-12</i> | <i>Pges-1</i> +<br><i>Pcol-12</i> | <i>Punc-119</i><br>+ <i>Pges-1</i> | <i>Pmyo-3</i>               | <i>Pcol-12</i> | <i>Pges-1</i> | <i>Punc-119</i> | <i>Pdaf-16</i>             |
| Rescue 1 | no rescue                           | <b>0.001</b>                        | <b>0.013</b>                      | <b>0.001</b>                       | 0.245                       | <b>0.003</b>   | <b>0.010</b>  | <b>0.001</b>    | <b>9.6x10<sup>-7</sup></b> |
|          | <i>Pdaf-16</i>                      | <b>0.003</b>                        | <b>0.008</b>                      | <b>0.005</b>                       | <b>1.3x10<sup>-12</sup></b> | <b>0.001</b>   | <b>0.001</b>  | <b>0.008</b>    | N/A                        |
|          | <i>Punc-119</i>                     | 0.276                               | N/A                               | 0.402                              | <b>4.5x10<sup>-7</sup></b>  | 0.521          | 0.302         | N/A             |                            |
|          | <i>Pges-1</i>                       | N/A                                 | 0.596                             | 0.090                              | <b>2.5x10<sup>-5</sup></b>  | 0.663          | N/A           |                 |                            |
|          | <i>Pcol-12</i>                      | 0.088                               | 0.845                             | N/A                                | <b>2.7x10<sup>-6</sup></b>  | N/A            |               |                 |                            |
|          | <i>Pmyo-3</i>                       | N/A                                 | N/A                               | N/A                                | N/A                         |                |               |                 |                            |
|          | <i>Punc-119</i><br>+ <i>Pges-1</i>  | N/A                                 | N/A                               | N/A                                |                             |                |               |                 |                            |
|          | <i>Pges-1</i> +<br><i>Pcol-12</i>   | N/A                                 | N/A                               |                                    |                             |                |               |                 |                            |
|          | <i>Punc-119</i><br>+ <i>Pcol-12</i> | N/A                                 |                                   |                                    |                             |                |               |                 |                            |
