# Supplementary material for: dbl-1/TGF-β and daf-12/NHR Signaling Mediate Cell-Nonautonomous Effects of daf-16/FOXO on Starvation-Induced Developmental Arrest
Source: PubMed Central journal article supplement (PMC4676721; doi:10.1371/journal.pgen.1005731), 2015-12-11
Supplement: pgen.1005731.s003.pdf [file pgen.1005731.s003.pdf]

**S3 Table. Starvation survival analysis of Figure 5.**

| Genotype                         | Half-life | SEM | p-value (vs. wild type) | p-value (vs. <i>daf-16</i> ) | R <sup>2</sup> |
|----------------------------------|-----------|-----|-------------------------|------------------------------|----------------|
| wild type                        | 21.9      | 1.1 | N/A                     | <b>0.002</b>                 | 0.976          |
| <i>dbl-1</i>                     | 18.8      | 0.2 | <b>0.049</b>            | <b>0.002</b>                 | 0.945          |
| <i>sma-9</i>                     | 22.3      | 0.7 | 0.720                   | <b>0.001</b>                 | 0.970          |
| <i>daf-16</i>                    | 11.5      | 1.1 | <b>0.002</b>            | N/A                          | 0.988          |
| <i>daf-16; dbl-1</i>             | 9.7       | 1.3 | <b>0.002</b>            | 0.355                        | 0.976          |
| <i>daf-16; sma-9</i>             | 9.9       | 1.1 | <b>0.001</b>            | 0.371                        | 0.951          |
| wild type                        | 21.2      | 0.8 | N/A                     | <b>0.002</b>                 | 0.980          |
| <i>daf-36</i>                    | 20.1      | 1.0 | 0.298                   | <b>0.004</b>                 | 0.965          |
| <i>daf-9</i>                     | 24.9      | 0.5 | 0.060                   | <b>3.2x10<sup>-4</sup></b>   | 0.985          |
| <i>daf-12(rh273)</i>             | 17.9      | 1.0 | 0.090                   | <b>0.002</b>                 | 0.994          |
| <i>daf-16</i>                    | 11.6      | 0.6 | <b>0.002</b>            | N/A                          | 0.986          |
| <i>daf-16; daf-36</i>            | 13.2      | 0.9 | <b>0.003</b>            | 0.263                        | 0.959          |
| <i>daf-16; daf-9</i>             | 11.9      | 1.5 | <b>0.005</b>            | 0.805                        | 0.981          |
| <i>daf-16; daf-12(rh273)</i>     | 9.9       | 1.4 | <b>0.001</b>            | 0.345                        | 0.992          |
| wild type                        | 21.4      | 2.0 | N/A                     | <b>0.011</b>                 | 0.974          |
| <i>din-1</i>                     | 22.9      | 1.1 | 0.538                   | <b>0.002</b>                 | 0.966          |
| <i>daf-12(m20)</i>               | 21.4      | 2.0 | 0.987                   | <b>0.010</b>                 | 0.977          |
| <i>daf-12(rh61rh411)</i>         | 19.4      | 2.3 | 0.542                   | <b>0.032</b>                 | 0.962          |
| <i>daf-16</i>                    | 11.2      | 1.1 | <b>0.011</b>            | N/A                          | 0.977          |
| <i>daf-16; din-1</i>             | 11.4      | 0.9 | <b>0.010</b>            | 0.868                        | 0.956          |
| <i>daf-16; daf-12(m20)</i>       | 7.9       | 0.8 | <b>0.003</b>            | 0.073                        | 0.985          |
| <i>daf-16; daf-12(rh61rh411)</i> | 12.6      | 1.3 | <b>0.020</b>            | 0.451                        | 0.911          |
